# Supplementary material for: Intestinal Transport Characteristics and Metabolism of C-Glucosyl Dihydrochalcone, Aspalathin
Source: Molecules. 2017 Mar 30;22(4):554. doi: 10.3390/molecules22040554 (PMC6154319; doi:10.3390/molecules22040554)
Supplement: Supplementary file 1 [file molecules-22-00554-s001.pdf]

*Supplementary material for:*

# Intestinal Transport Characteristics and Metabolism of C-Glucosyl Dihydrochalcone, Aspalathin

Sandra Bowles <sup>1,\*</sup>, Elizabeth Joubert <sup>2,3</sup>, Dalene de Beer <sup>2,3</sup>, Johan Louw <sup>1,4</sup>, Christel Brunschwig <sup>5,6,7</sup>, Mathew Njoroge <sup>5,6,7</sup>, Nina Lawrence <sup>6</sup>, Lubbe Wiesner <sup>7</sup>, Kelly Chibale <sup>5,6,8,9</sup>, and Christo Muller <sup>1,4,10</sup>

<sup>1</sup> Biomedical Research and Innovation Platform, South African Medical Research Council, Tygerberg, Cape Town, 7130, South Africa; johan.louw@mrc.ac.za (J.L.); christo.muller@mrc.ac.za (C.M.)

<sup>2</sup> Plant Bioactives Group, Post-Harvest and Wine Technology Division, Agricultural Research Council, Infruitec-Nietvoorbij, Stellenbosch 7600, South Africa; JoubertL@arc.agric.za (E.J.); DBeerD@arc.agric.za (D.d.B.)

<sup>3</sup> Department of Food Science, Stellenbosch University, Stellenbosch 7600, South Africa

<sup>4</sup> Department of Biochemistry and Microbiology, University of Zululand, Kwa-Dlangezwa 3886, South Africa

<sup>5</sup> Department of Chemistry, University of Cape Town, Rondebosch 7701, South Africa; CA.brunschwig@uct.ac.za (C.B.); Mathew.Njoroge@uct.ac.za (M.N.); kelly.chibale@uct.ac.za (K.C.);

<sup>6</sup> Drug Discovery and Development Centre (H3D), University of Cape Town, Rondebosch 7701, South Africa; nina.lawrence@uct.ac.za

<sup>7</sup> Division of Clinical Pharmacology, University of Cape Town, Observatory, Cape Town 7925, South Africa; lubbe.wiesner@uct.ac.za

<sup>8</sup> Institute of Infectious Disease and Molecular Medicine, Faculty of Health Sciences, University of Cape Town, Observatory 7925, Cape Town, South Africa

<sup>9</sup> South African Medical Research Council Drug, Discovery and Development Research Unit, University of Cape Town, Rondebosch 7701, South Africa

<sup>10</sup> Department of Medical Physiology, Stellenbosch University, Tygerberg 7507, South Africa

\* Correspondence: sandra.bowles@mrc.ac.za; Tel./Fax: +27-219-380-479

## 1. Caco-2 Transport Experiments

### 1.1. Cytotoxicity

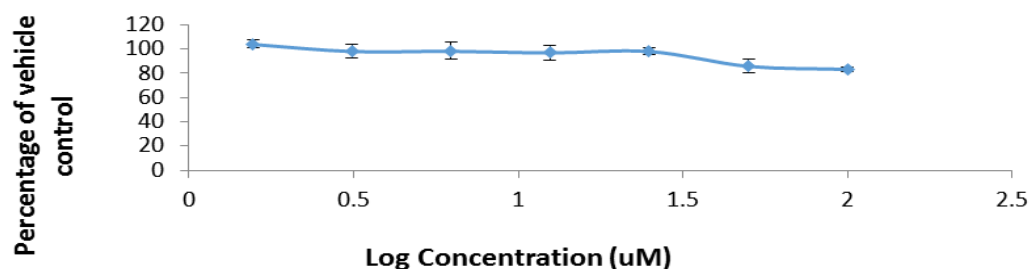

**Figure S1:** The cytotoxic effects of aspalathin at various concentrations in HBSS buffer (pH 6.0) on Caco-2 cells was assessed by the Vialight™ plus kit. Caco-2 cells were seeded at a density of  $4 \times 10^4$  cells/cm<sup>2</sup> into white clear bottomed 96-well plates and cytotoxicity was assessed according to the manufacturer's recommendation after 12–13 days.

### 1.2. Analytical Conditions of High-Performance Liquid Chromatography with Diode-Array Detection (HPLC-DAD) with Example Chromatograms.

HPLC-DAD analysis was performed on an Agilent 1200 system (Agilent Technologies, Inc., Santa Clara, CA) equipped with an in-line degasser, quaternary pump, autosampler, column thermostat, and DAD, controlled by Chemstation software (Agilent Technologies, Waldbronn, Germany). The chromatographic conditions were as follows: Separation was performed at 30 °C on a Poroshell SB-C18 column (50 × 4.6 mm, 2.7 µm particle size; Agilent Technologies, Inc.) protected by an Acquity UPLC in-line filter (Waters; 0.2 µm) and an Acquity UPLC VanGuard pre-column (Waters; stationary phase: BEH C18 1.7 µm). The flow rate was 1.0 mL/min, and a multilinear gradient was performed as follows: 0.0–10.0 min, 12.4–16.6% B; 10.0–10.5 min, 16.6–80.0% B; 10.5–11.5 min, 80.0% B; 11.5–12.0 min, 80.0–12.4% B; 12.0–16.0 min, 12.4% B, with solvents A and B being acetonitrile and 0.1% aqueous formic acid, respectively. UV spectra were recorded between 220 and 450 nm.

Stock solutions of the phenolic standards were prepared in dimethylsulfoxide (DMSO) at concentrations of approximately 1 mg/mL and diluted with water according to experimental requirements. All diluted solutions were filtered through 0.22 µm polyvinylidene difluoride (PVDF) filters (Merck Millipore) prior to use.

Six-point calibration curves were set up for all standards. The calibration mixtures were injected at different injection volumes, giving on-column levels of 0.008–1.7 µg for aspalathin, 0.04–0.8 µg for caffeine, and 0.01–0.2 µg for both isoorientin and orientin. Nothofagin was quantified using a previously determined response factor applied to the aspalathin calibration curve. Linear regression, using the least-squares method (Microsoft Excel 2013, Microsoft Corporation, Redmond, WA), was performed on the calibration curve data for each compound to determine the slope and *y*-intercept. Dihydrochalcones (aspalathin and nothofagin) and caffeine were quantified using their respective peak areas at 288 nm, while the flavones (isoorientin and orientin) were quantified at 350 nm.

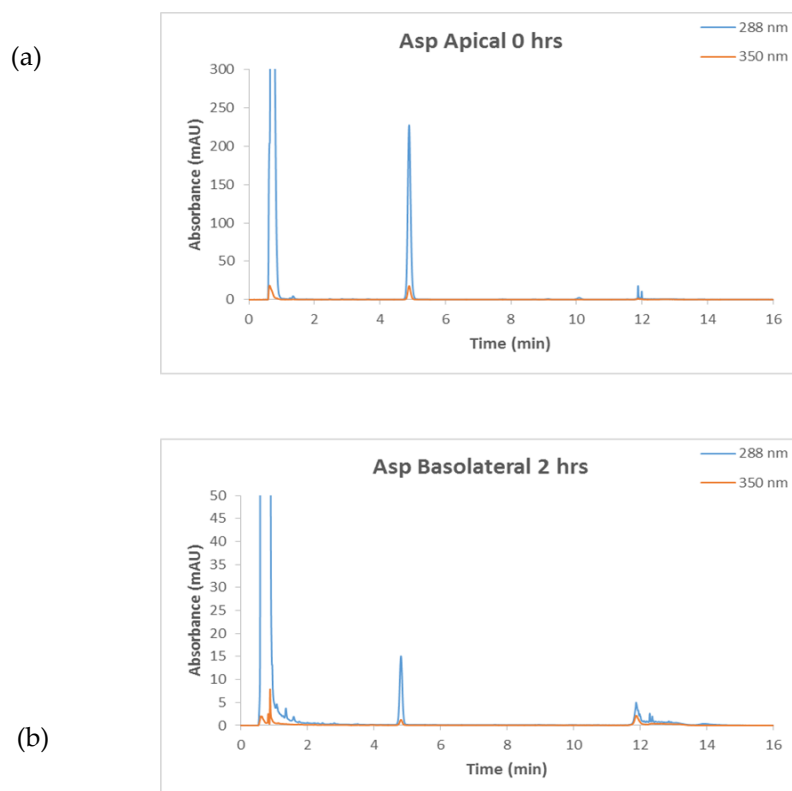

**Figure S2:** Example HPLC-DAD chromatograms of (a) apical (time = 0 h) and (b) basolateral (time = 2 h) samples taken from Caco-2 monolayers after incubation with aspalathin.

### 1.3. Protein Detection

Protein was isolated from differentiated Caco-2 monolayer cell lysates. The total protein content was determined and analysed by SDS-PAGE. 50 ug of total protein was denatured and loaded onto a 10% SDS-polyacrylamide gel and transferred to a PVDF membrane, using a wet-blot system. Non-specific binding was blocked, using 5% w/v low-fat milk in Tris-buffered saline with Tween-20 (10 mmol/L Tris-HCl, pH 7.5, 200 mmol/L NaCl, 0.05% Tween-20) at room temperature for 2 h. Subsequently, the membrane was incubated overnight at 4°C in the presence of the following primary antibodies: anti- SGLT1 ab14686 (1:1000 dilution), anti-GLUT2 ab54460 (1:1000), anti-MDR sc55510 (1:1000), and carnitine palmitoyltransferase (CPT1; 1:1000) with the relevant horseradish peroxidase conjugated secondary antibodies applied the following day for 90 min at room temperature.  $\beta$ -Actin (1:4000) antibody was added as a loading control. Proteins were detected and quantified using a Chemidoc-XRS imager and Quantity One software (Bio-Rad Laboratories, Hercules, CA, USA).

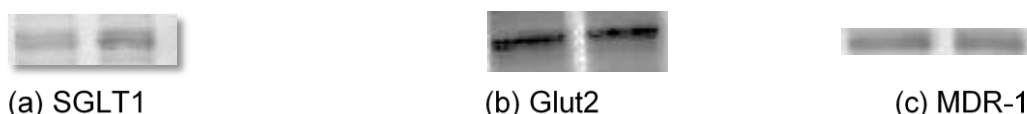

**Figure S3:** Western Blot analysis of (a) SGLT1 (72 kDa), (b) GLUT2 (60 kDa), and (c) MDR-1 (170 kDa).

#### 1.4. Stability of Aspalathin.

In order to determine the stability of aspalathin in the buffer employed for the Caco-2 assay, the aspalathin-enriched extract (SB1) were incubated in sealed vials with deionised water, HEPES buffer pH 6 and HEPES buffer pH 7.4, respectively. The aspalathin content were determined for these samples prior to incubation and after 2 h incubation. The percentage aspalathin degradation obtained in deionised water, HEPES buffer at pH 6 and HEPES buffer at pH 7.4 were 1, 10, and 11%, respectively.

## 2. In Vivo Metabolism of Aspalathin

### 2.1. Fragmentation of Aspalathin in Negative Mode

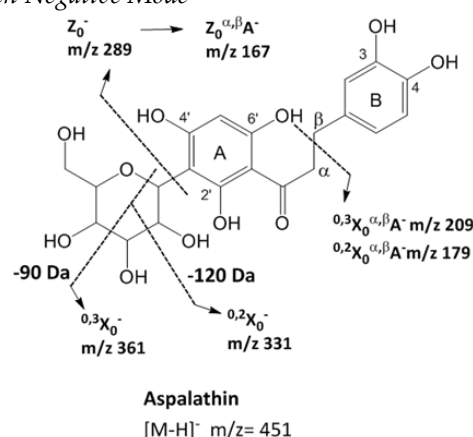

**Figure S4:** Diagnostic ions for the negative product ion spectra fragmentation of aspalathin and its metabolites

## 2.2. In Vitro Incubation of Aspalathin in Mouse Liver Microsomes

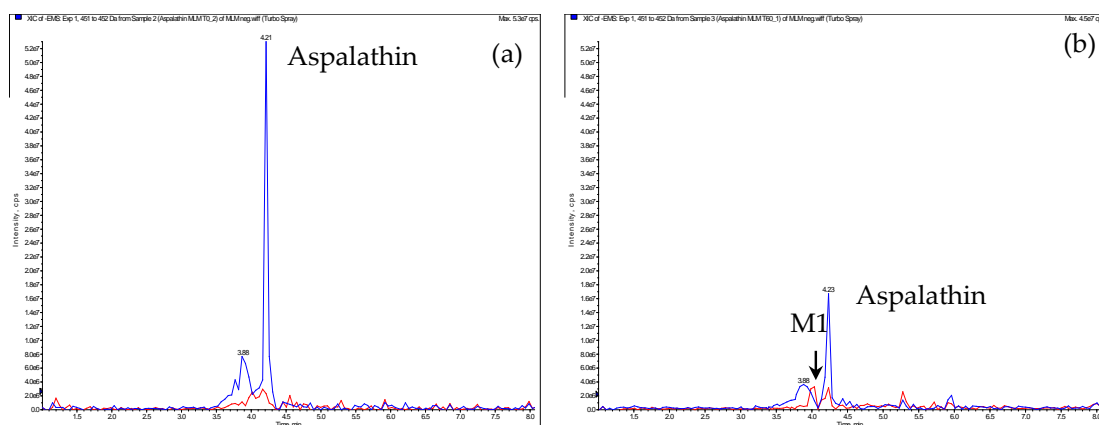

**Figure S5:** Extracted ion chromatograms of aspalathin and its products formed in (a) no incubation control and (b) mouse liver microsome incubation.

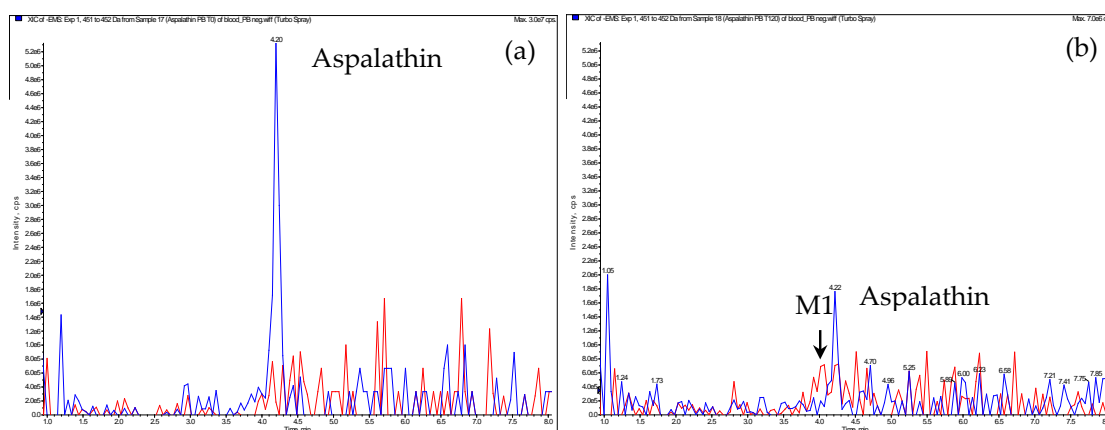

**Figure S6:** Extracted ion chromatograms of aspalathin and its products formed in the (a) no incubation control and (b) phosphate buffer incubation.

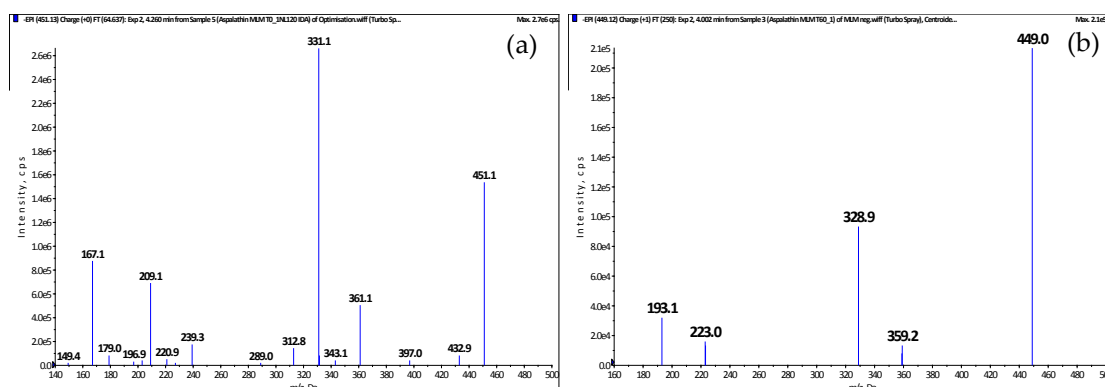

**Figure S7.** Product ion spectrum of the  $[M-H]^-$  ion of (a) aspalathin and (b) M1 (identified as C-glycosyl eriodictyol).
